# Supplementary material for: Histological changes of female reproductive organs subjected to different jumping exercise intensities and honey supplementation in rats
Source: PeerJ. 2019 Sep 10;7:e7646. doi: 10.7717/peerj.7646 (PMC6743611; doi:10.7717/peerj.7646)
Supplement: Supplemental Information 1 [file peerj-07-7646-s001.xlsx]

## Sheet: Raw data Maryam et al
Group	ID	Endometrium	Myometrium	Vessel	Gland	GFfollicle	atreticFollicle	cystic	haemoregia	luteum	OvaryVessel
1	C01	4.5	112.3	30	#NULL!	18	4	9	0	16	14
1	C02	2.8	68.8	9	28	9	1	5	0	12	11
1	C03	2.9	138.3	10	20	10	7	13	1	13	10
1	C04	3	#NULL!	22	40	16	2	18	1	23	14
1	C05	3.3	122.9	22	20	11	3	#NULL!	0	15	7
1	C06	3.7	132.3	7	17	5	1	#NULL!	0	11	1
1	C07	4.3	136.8	8	18	#NULL!	11	5	0	15	21
1	C08	5.9	91.7	23	24	#NULL!	6	1	0	#NULL!	50
1	C09	3.9	128.5	7	22	12	14	7	1	18	26
1	C010	4.4	102.5	3	37	14	12	9	0	19	10
1	C011	2.9	125	13	32	15	13	10	0	19	26
1	C012	2.4	94.3	8	#NULL!	4	#NULL!	#NULL!	0	15	1
1	C013	3.9	105.6	30	27	8	3	10	0	17	12
1	C014	2	87	20	26	10	4	11	0	8	14
2	C1	2.7	128.8	15	22	5	1	6	8	9	7
2	C2	5.6	72.4	16	#NULL!	5	2	2	0	4	5
2	C3	3.4	#NULL!	12	24	1	2	11	1	6	8
2	C4	4.2	113.2	8	#NULL!	10	12	4	2	8	4
2	C5	5.4	108.4	30	18	6	1	6	10	13	15
2	C6	2.7	80.4	9	33	3	#NULL!	6	0	4	3
2	C7	0	81.5	0	#NULL!	5	#NULL!	#NULL!	0	6	2
2	C8	3.4	97	10	22	10	#NULL!	10	1	9	2
2	C9	6.1	104.8	20	29	10	#NULL!	18	2	10	6
2	C10	3.3	140.3	7	16	6	5	3	1	6	5
2	C11	2.2	143.8	26	17	18	2	6	1	14	14
2	C12	3.8	#NULL!	12	19	14	8	8	0	12	13
3	H1	8.4	97.7	27	16	#NULL!	1	2	0	4	4
3	H2	4	98.9	15	39	#NULL!	2	3	0	13	16
3	H3	8.3	139.8	12	#NULL!	6	3	5	2	10	2
3	H4	12.5	90.4	8	31	13	1	7	0	1	9
3	H5	12.2	74.6	10	19	9	1	2	0	6	33
3	H6	11	114.8	10	24	15	4	12	0	8	28
3	H7	7	74.2	14	22	6	3	8	0	3	13
3	H8	4.7	89.1	10	20	7	#NULL!	1	0	10	14
3	H9	6	71	9	25	12	3	10	0	21	8
3	H10	7	#NULL!	50	15	8	4	#NULL!	0	2	3
3	H11	5.1	123.9	17	14	9	2	#NULL!	0	7	9
3	H12	3.5	84.9	40	15	12	1	15	1	12	4
4	J201	5.2	92.8	35	6	6	1	20	2	8	8
4	J202	6.7	127.1	15	#NULL!	#NULL!	1	#NULL!	0	3	1
4	J203	7.9	89.9	13	17	6	2	14	0	6	0
4	J204	2.2	90.9	38	15	9	4	17	0	7	14
4	J205	2.6	#NULL!	30	12	5	2	3	1	6	22
4	J206	1.9	96.4	22	18	9	2	3	0	5	6
4	J207	4.1	73.5	7	16	3	2	4	0	5	3
4	J208	3.4	115.6	5	12	6	4	14	0	10	2
4	J209	0	42.2	0	#NULL!	#NULL!	2	4	0	9	12
4	J2010	3.4	86.3	7	18	7	3	3	0	14	8
4	J2011	2.5	82.8	35	11	4	1	4	0	2	4
4	J2012	3.14	84	12	14	5	#NULL!	1	0	5	6
5	J801	2.9	130.5	5	15	15	3	8	1	4	13
5	J802	2.5	#NULL!	13	19	#NULL!	8	#NULL!	4	9	6
5	J803	1.9	71.7	8	19	3	#NULL!	4	6	20	7
5	J804	4.9	#NULL!	10	9	5	2	1	2	9	2
5	J805	2.2	#NULL!	3	18	10	3	3	0	6	14
5	J806	0	73.5	0	#NULL!	#NULL!	#NULL!	#NULL!	0	#NULL!	0
5	J807	2.2	71.6	16	15	#NULL!	4	5	0	6	10
5	J808	0	64.9	0	#NULL!	12	14	21	2	8	4
5	J809	0	71.6	0	#NULL!	#NULL!	#NULL!	#NULL!	0	#NULL!	0
5	J8010	3.4	#NULL!	4	4	7	4	7	2	4	7
5	J8011	2.8	90.2	20	3	7	14	5	2	10	6
5	J8012	3.2	50.1	8	#NULL!	3	1	#NULL!	1	3	1
5	J8013	2.2	95.4	8	11	5	6	1	4	18	8
6	HJ201	0	117.7	0	#NULL!	#NULL!	#NULL!	#NULL!	0	#NULL!	0
6	HJ202	6.1	161.4	15	20	15	13	4	0	11	19
6	HJ203	6.2	84.9	8	13	15	#NULL!	14	0	20	26
6	HJ204	6	99.8	20	22	9	5	2	0	4	12
6	HJ205	3.9	134.4	18	20	9	7	#NULL!	0	14	25
6	HJ206	13.2	#NULL!	36	19	#NULL!	#NULL!	#NULL!	0	#NULL!	0
6	HJ207	6	152.1	7	25	6	10	9	0	21	16
6	HJ208	5.5	154	13	15	13	4	10	0	4	17
6	HJ209	7.4	79.8	46	#NULL!	16	3	#NULL!	0	7	18
6	HJ2010	10.3	85.4	32	38	4	4	#NULL!	0	4	10
6	HJ2011	7.2	149.5	23	21	#NULL!	5	1	0	20	18
6	HJ2012	4.2	121.6	14	23	#NULL!	7	2	0	20	20
7	HJ801	5.4	137.7	10	15	2	7	#NULL!	0	7	7
7	HJ802	5.1	112.4	13	24	3	3	#NULL!	0	14	5
7	HJ803	8.8	164.4	37	10	#NULL!	#NULL!	#NULL!	0	#NULL!	0
7	HJ804	7.1	174.8	7	11	5	#NULL!	12	0	3	8
7	HJ805	6.7	139.3	25	#NULL!	#NULL!	2	15	0	5	2
7	HJ806	3.3	110.7	27	13	8	15	3	0	2	7
7	HJ807	5.6	121.2	26	32	#NULL!	#NULL!	#NULL!	0	#NULL!	0
7	HJ808	8.1	172.1	41	28	6	#NULL!	1	0	8	13
7	HJ809	7.3	132.6	13	17	11	9	14	2	12	3
7	HJ8010	8.6	#NULL!	13	13	9	#NULL!	#NULL!	0	7	4
7	HJ8011	4.2	#NULL!	22	25	14	9	6	1	8	24
7	HJ8012	6.2	#NULL!	25	50	9	6	10	0	4	29
7	HJ8013	2.6	#NULL!	21	#NULL!	#NULL!	#NULL!	0	0	#NULL!	0
